# Supplementary material
Source: PubMed Central journal article supplement (PMC6774819)
Supplement: NIHMS1533702-supplement-1.pdf [file NIHMS1533702-supplement-1.pdf]

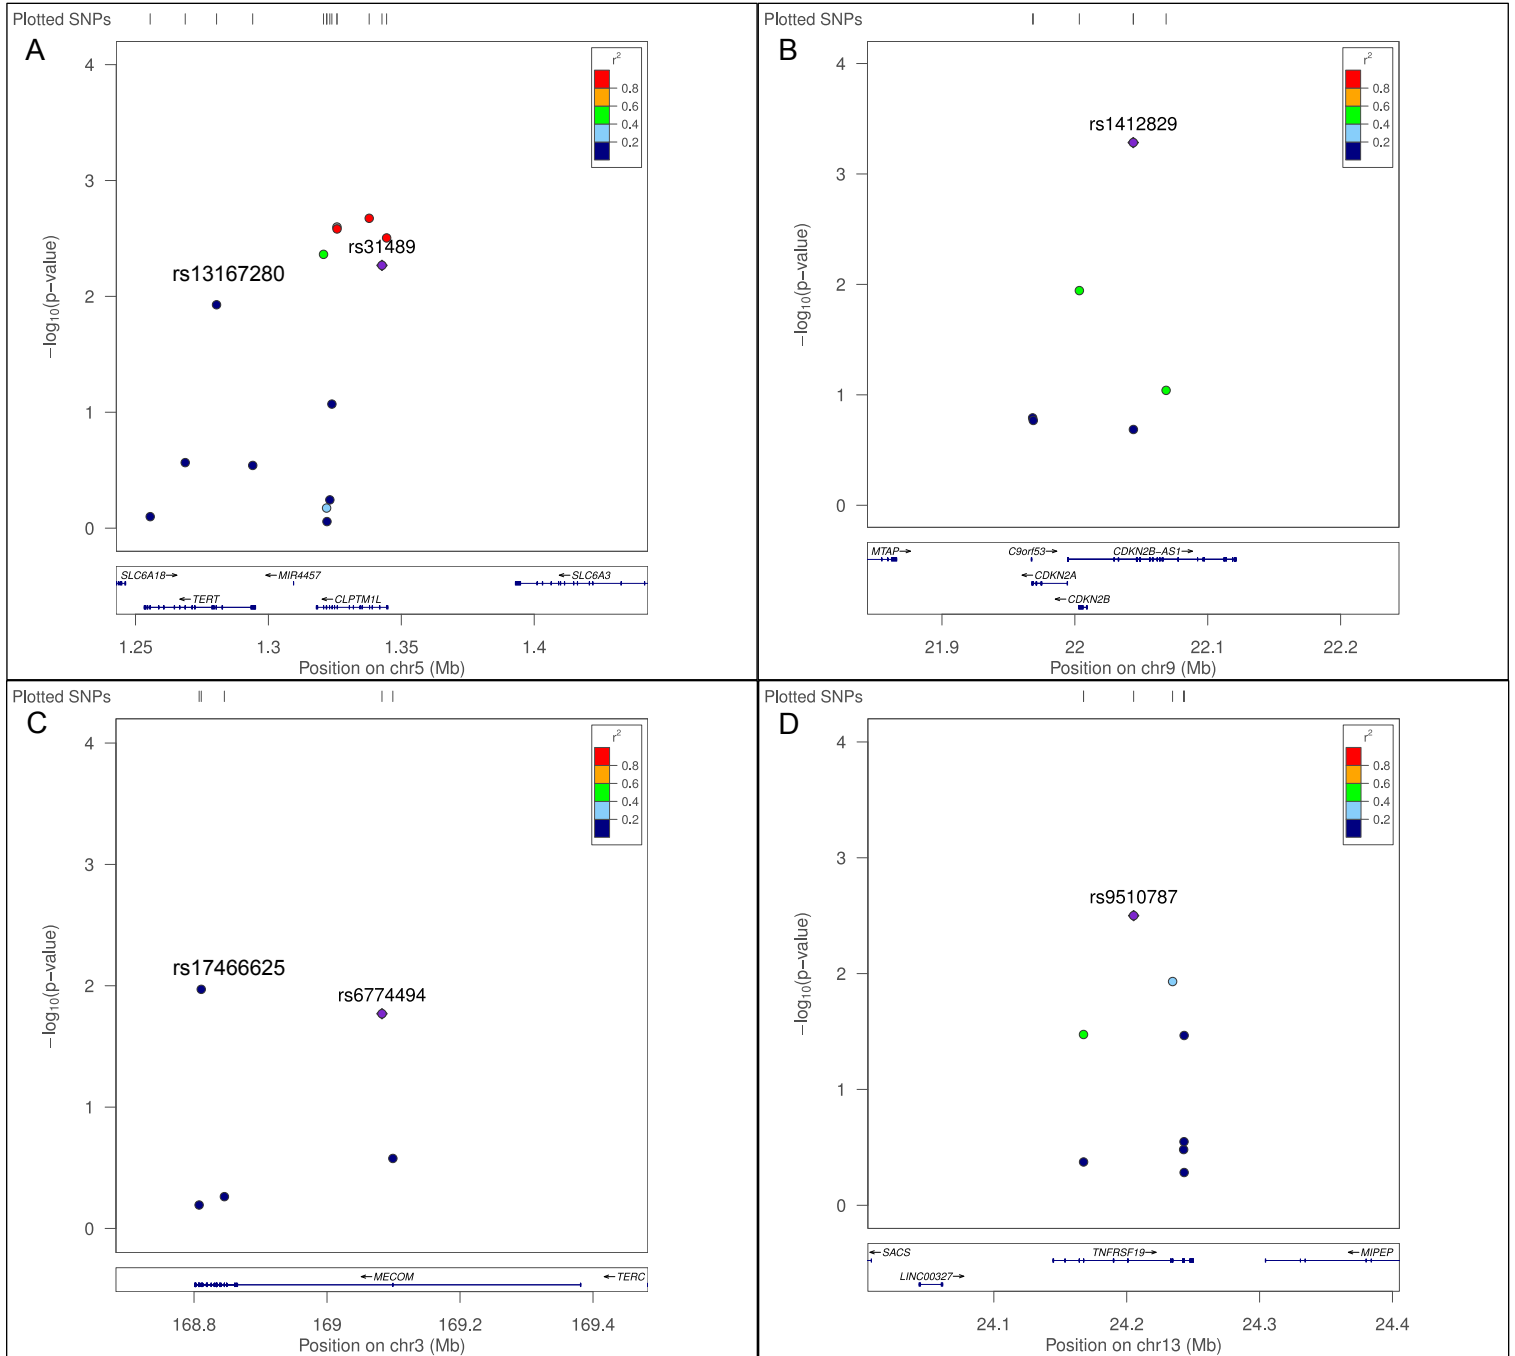

**Supplementary Figure 1.** Regional plot for the A) CLPTM1L/TERT locus, B) CDKN2A/2B locus, C) MECOM locus, D) TNFRSF19 locus.
